# Supplementary material for: Preparation of Porous Stainless Steel Hollow-Fibers through Multi-Modal Particle Size Sintering towards Pore Engineering
Source: MDPI journal article supplement (doi:10.3390/membranes7030040), 2017-08-04
Supplement: s1 [file s1]

# Supporting Information

## Preparation of Porous Stainless Steel Hollow-Fibers through Multi-Modal Particle Size Sintering towards Pore Engineering

Francois-Marie Allieux, Oana David, Miren Etxeberria Benavides, Lingxue Kong, David Alfredo Pacheco Tanaka, Ludovic F. Dumée

### 1. Tables and Figures

Table S1. Spinning conditions.

| Sample                 | Dope Flow Rate (mL·h <sup>-1</sup> ) | Air Gap (cm) | Bore Flow Rate (mL·h <sup>-1</sup> ) | Bore Composition |
|------------------------|--------------------------------------|--------------|--------------------------------------|------------------|
| SS <sub>10</sub> HF    | 300                                  | 3            | 100                                  | Water            |
| SS <sub>10/20</sub> HF | 300                                  | 1.5          | 150                                  | Water            |
| SS <sub>10/44</sub> HF | 300                                  | 1.5          | 100                                  | Water            |

Table S2. Size distribution of stainless steel particles.

| Metal Particles  | Equivalent Spherical Diameter in DI Water (μm) |           |            | Equivalent Spherical Diameter in IP (μm) |            |            |
|------------------|------------------------------------------------|-----------|------------|------------------------------------------|------------|------------|
|                  | d0.1                                           | d0.5      | d0.9       | d0.1                                     | d0.5       | d0.9       |
| SS <sub>10</sub> | 3.1 ± 0.1                                      | 5.4 ± 0.1 | 8.6 ± 0.2  | 3.3 ± 0.1                                | 6.1 ± 0.1  | 9.5 ± 0.2  |
| SS <sub>20</sub> | 2.5 ± 0.1                                      | 9.3 ± 0.1 | 20.2 ± 0.4 | 2.8 ± 0.1                                | 10.8 ± 0.1 | 25.3 ± 0.2 |
| SS <sub>44</sub> | 17.3 ± 0.5                                     | 37.3 ± 1  | 71.9 ± 1.1 | 18.3 ± 0.1                               | 39.3 ± 0.2 | 78.3 ± 0.4 |

Table S3. Metal powder properties: surface area, total BET surface area, average absolute density and relative density determined versus average bulk density of 316L grade stainless steel (8 g·cm<sup>-3</sup>).

| Metal Powder        | Surface Area (m <sup>2</sup> ·g <sup>-1</sup> ) | Total BET Surface Area (m <sup>2</sup> ) |
|---------------------|-------------------------------------------------|------------------------------------------|
| SS <sub>10</sub>    | 0.034                                           | 0.087                                    |
| SS <sub>20</sub>    | 0.036                                           | 0.096                                    |
| SS <sub>44</sub>    | 0.052                                           | 0.139                                    |
|                     | Average Absolute Density (g·cm <sup>-3</sup> )  | Relative Density (%)                     |
| SS <sub>10</sub>    | 4.84                                            | 39.46                                    |
| SS <sub>20</sub>    | 3.17                                            | 60.41                                    |
| SS <sub>44</sub>    | 4.69                                            | 41.42                                    |
| SS <sub>10/20</sub> | 2.45                                            | 69.38                                    |
| SS <sub>10/44</sub> | 2.72                                            | 66.15                                    |

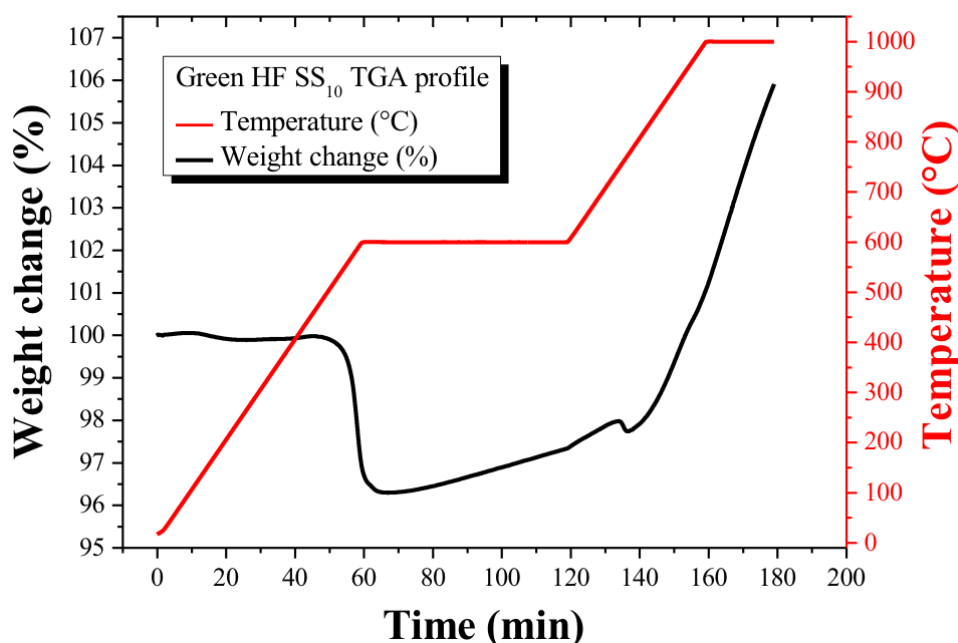

Figure S1. Thermal treatment and TGA profile of the green SS<sub>10</sub> HF in air atmosphere with a heating rate of 10 °C·min<sup>-1</sup>.

- Green SS<sub>10</sub> HFs

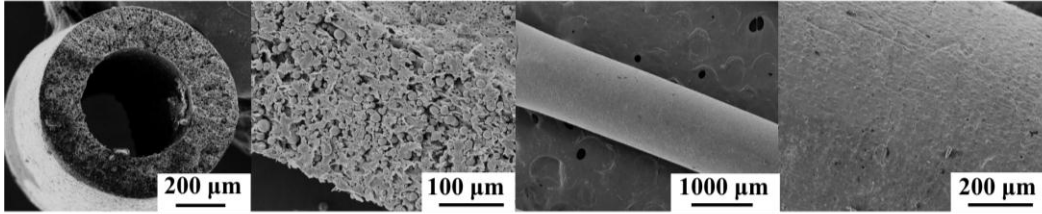

- SS<sub>10</sub> sintered 60 min at 650°C in N<sub>2</sub>:H<sub>2</sub> 15%

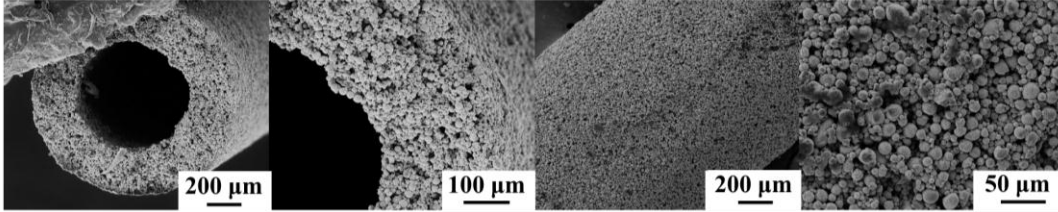

- SS<sub>10</sub> sintered 60 min at 700°C in N<sub>2</sub>:H<sub>2</sub> 15%

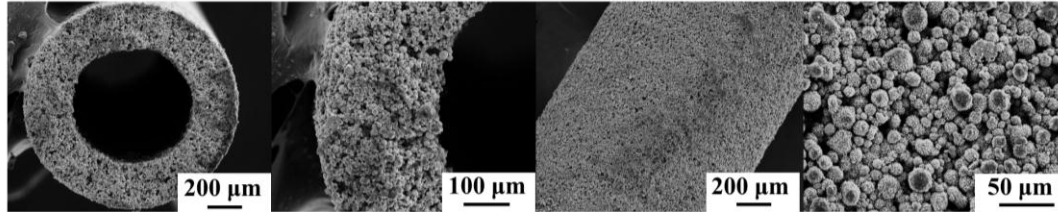

- SS<sub>10</sub> sintered 60 min at 800°C in N<sub>2</sub>:H<sub>2</sub> 15%

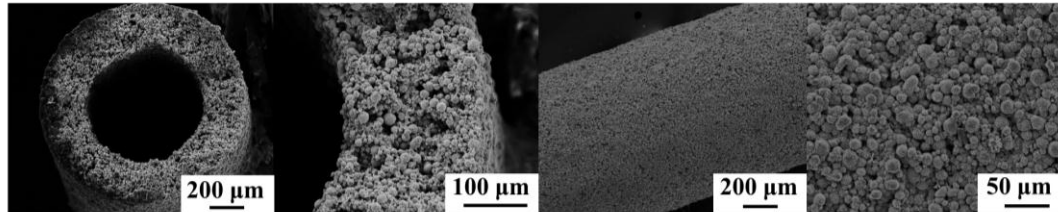

- SS<sub>10</sub> sintered 60 min at 900°C in N<sub>2</sub>:H<sub>2</sub> 15%

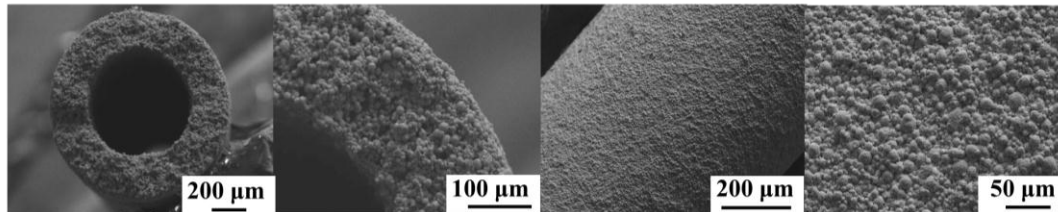

- SS<sub>10</sub> sintered 60 min at 1000°C in N<sub>2</sub>:H<sub>2</sub> 15%

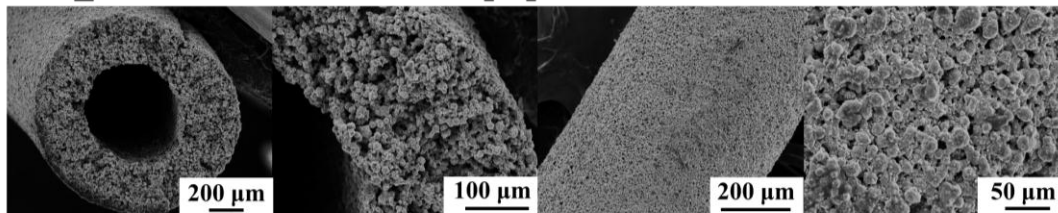

- SS<sub>10</sub> sintered 60 min at 1100°C in N<sub>2</sub>:H<sub>2</sub> 15%

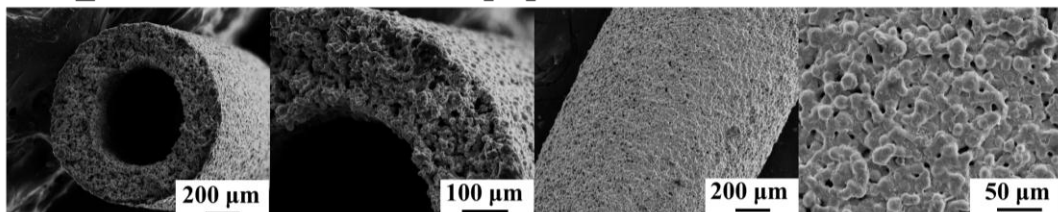

Figure 2. *Cont.*

- SS<sub>10</sub> sintered 90 min at 650°C in N<sub>2</sub>:H<sub>2</sub> 15%

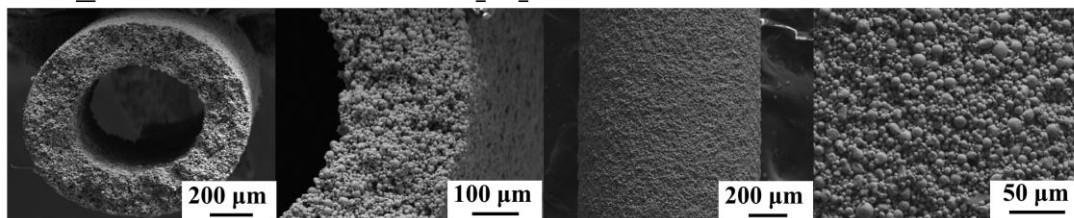

- SS<sub>10</sub> sintered 90 min at 700°C in N<sub>2</sub>:H<sub>2</sub> 15%

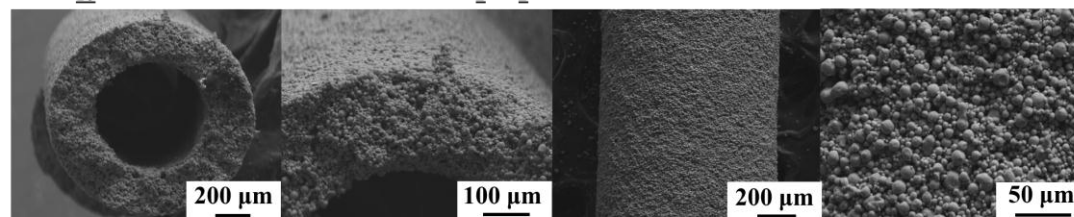

- SS<sub>10</sub> sintered 90 min at 800°C in N<sub>2</sub>:H<sub>2</sub> 15%

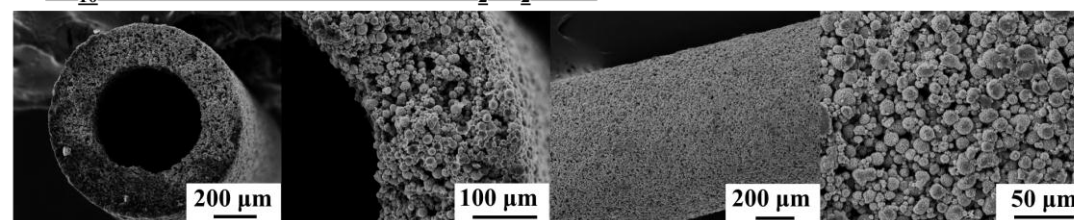

- SS<sub>10</sub> sintered 90 min at 900°C in N<sub>2</sub>:H<sub>2</sub> 15%

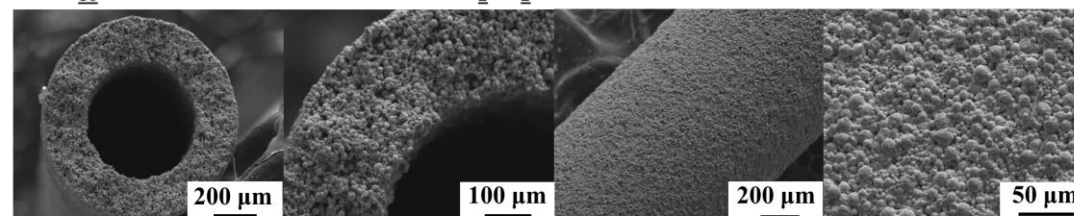

- SS<sub>10</sub> sintered 90 min at 1000°C in N<sub>2</sub>:H<sub>2</sub> 15%

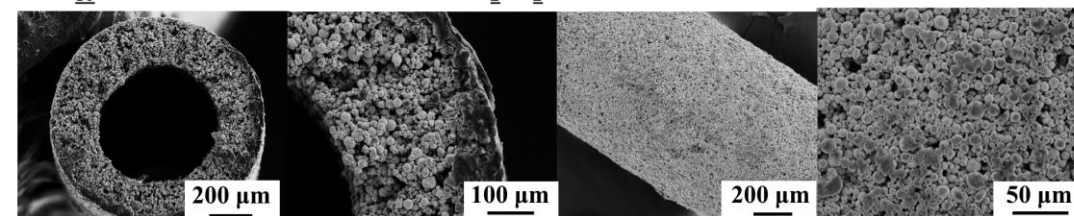

- SS<sub>10</sub> sintered 90 min at 1100°C in N<sub>2</sub>:H<sub>2</sub> 15%

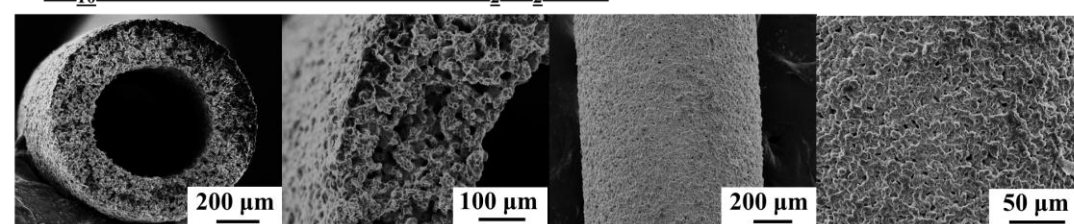

**Figure S2.** SEM images of the green and sintered SS<sub>10</sub> HF at temperature ranging from 650 to 1100 °C for 60 or 90 min.

• Green SS<sub>10/20</sub> HFs

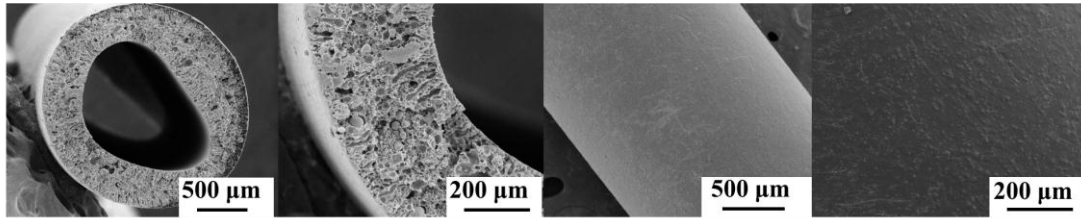

• SS<sub>10/20</sub> sintered 60 min at 650°C in N<sub>2</sub>:H<sub>2</sub> 15%

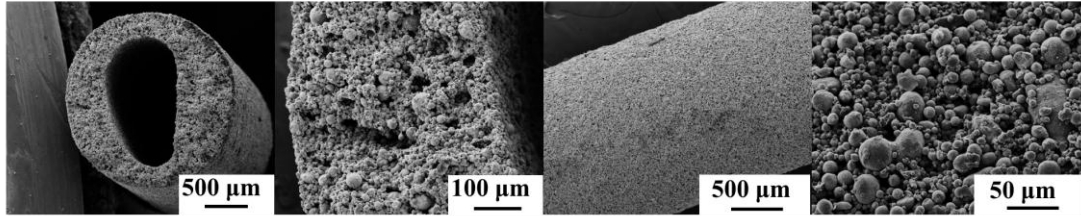

• SS<sub>10/20</sub> sintered 60 min at 700°C in N<sub>2</sub>:H<sub>2</sub> 15%

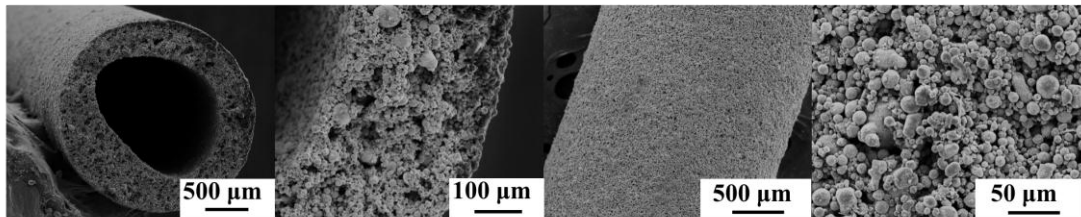

• SS<sub>10/20</sub> sintered 60 min at 800°C in N<sub>2</sub>:H<sub>2</sub> 15%

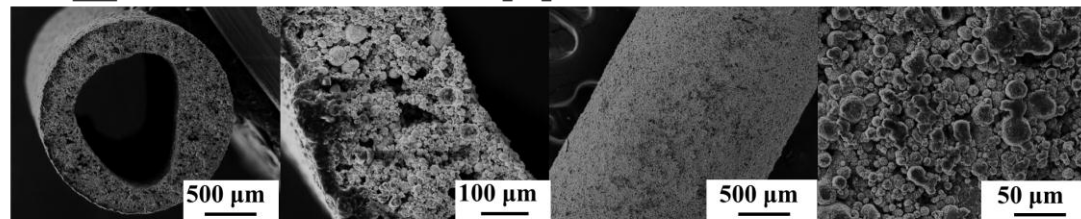

• SS<sub>10/20</sub> sintered 60 min at 900°C in N<sub>2</sub>:H<sub>2</sub> 15%

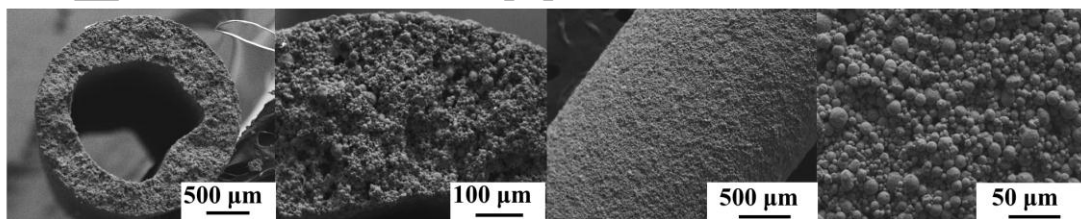

• SS<sub>10/20</sub> sintered 60 min at 1000°C in N<sub>2</sub>:H<sub>2</sub> 15%

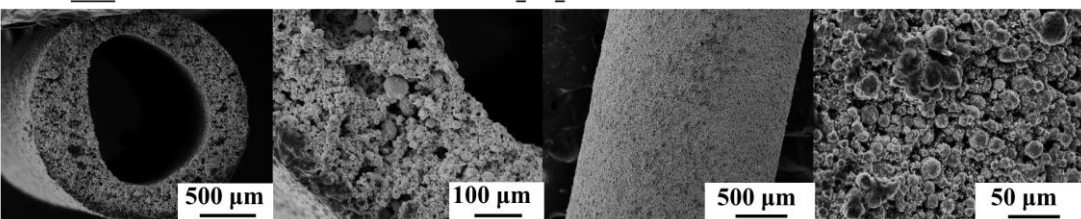

• SS<sub>10/20</sub> sintered 60 min at 1100°C in N<sub>2</sub>:H<sub>2</sub> 15%

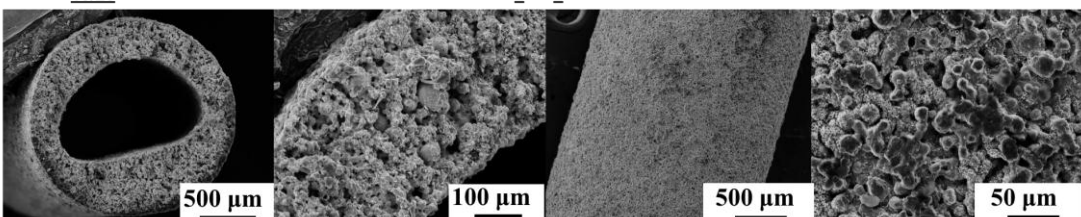

Figure 3. *Cont.*



- SS<sub>10/20</sub> sintered 90 min at 650°C in N<sub>2</sub>:H<sub>2</sub> 15%

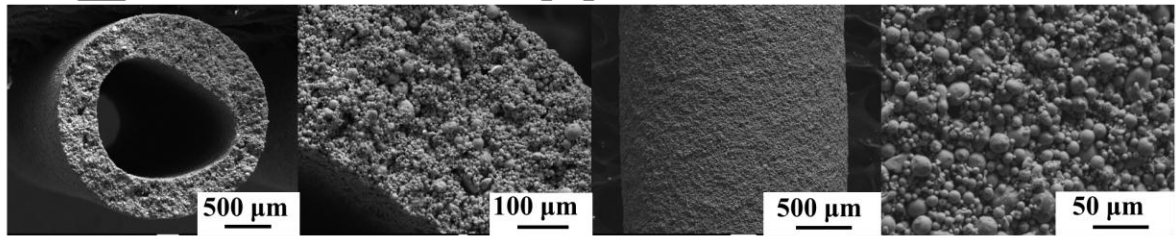

- SS<sub>10/20</sub> sintered 90 min at 700°C in N<sub>2</sub>:H<sub>2</sub> 15%

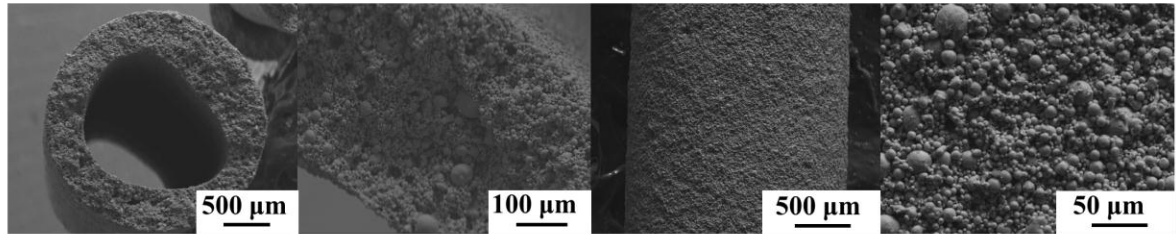

- SS<sub>10/20</sub> sintered 90 min at 800°C in N<sub>2</sub>:H<sub>2</sub> 15%

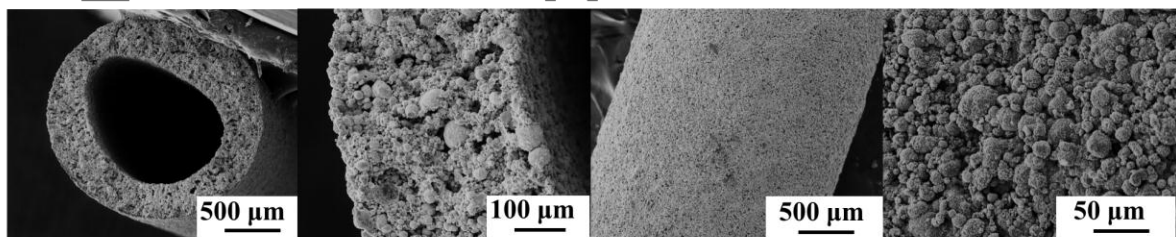

- SS<sub>10/20</sub> sintered 90 min at 900°C in N<sub>2</sub>:H<sub>2</sub> 15%

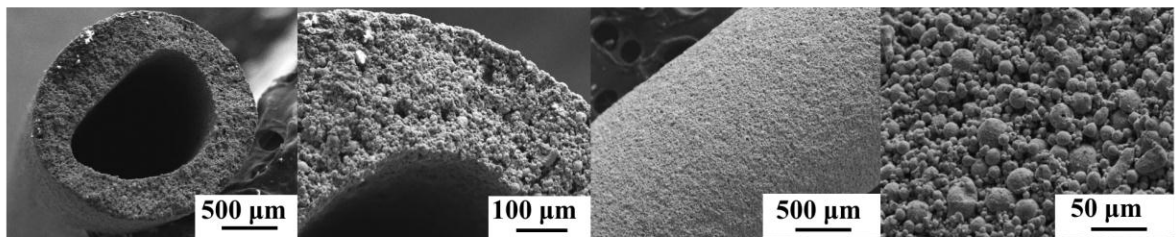

- SS<sub>10/20</sub> sintered 90 min at 1000°C in N<sub>2</sub>:H<sub>2</sub> 15%

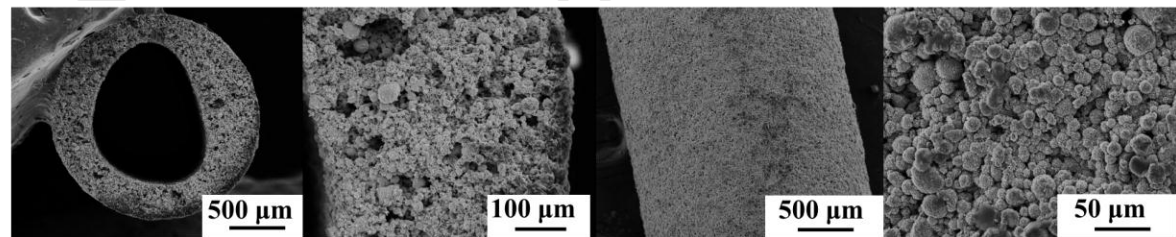

- SS<sub>10/20</sub> sintered 90 min at 1100°C in N<sub>2</sub>:H<sub>2</sub> 15%

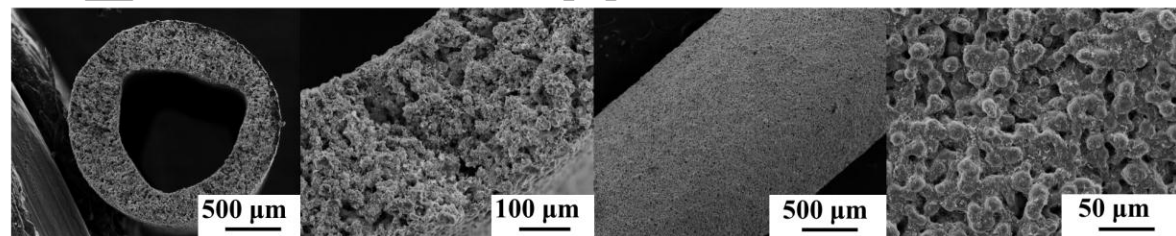

**Figure S3.** SEM images of the green and sintered SS<sub>10/20</sub> HF at temperature ranging from 650 to 1100 °C for 60 or 90 min.

- Green SS<sub>10/44</sub> HFs

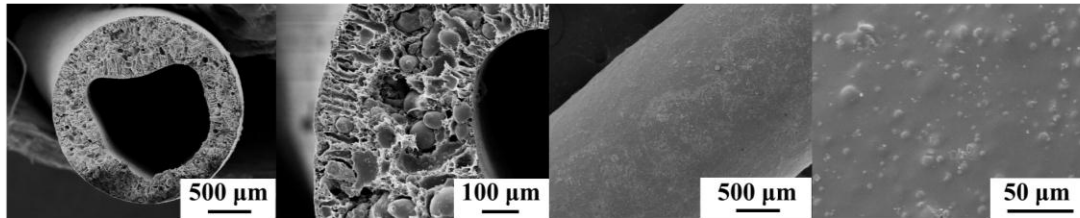

- SS<sub>10/44</sub> sintered 60 min at 650°C in N<sub>2</sub>:H<sub>2</sub> 15%

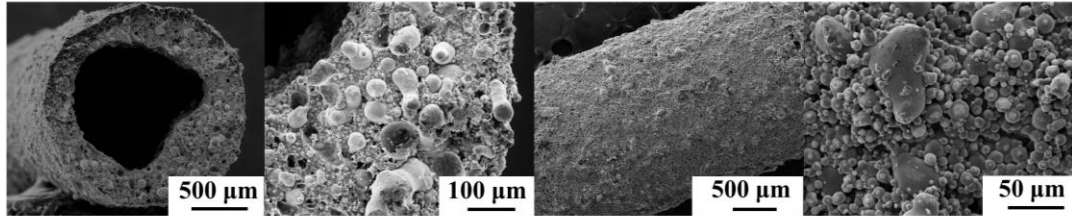

- SS<sub>10/44</sub> sintered 60 min at 700°C in N<sub>2</sub>:H<sub>2</sub> 15%

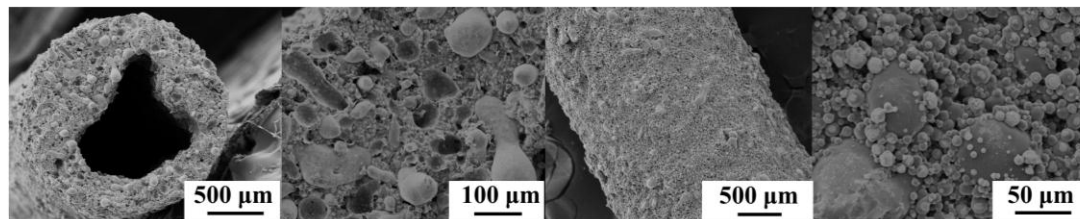

- SS<sub>10/44</sub> sintered 60 min at 800°C in N<sub>2</sub>:H<sub>2</sub> 15%

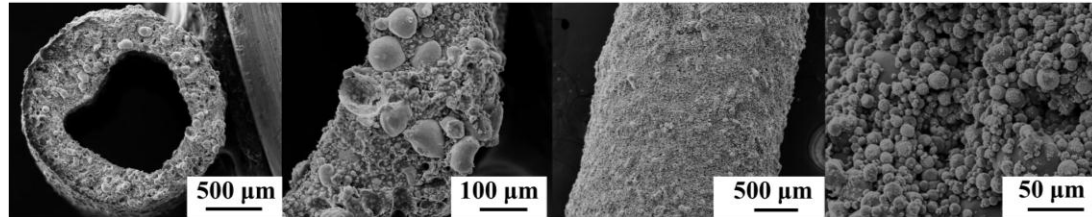

- SS<sub>10/44</sub> sintered 60 min at 900°C in N<sub>2</sub>:H<sub>2</sub> 15%

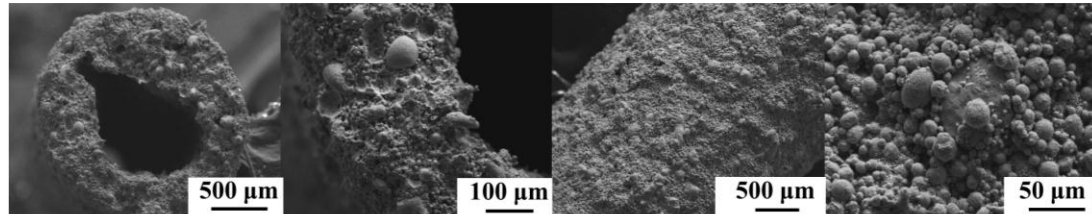

- SS<sub>10/44</sub> sintered 60 min at 1000°C in N<sub>2</sub>:H<sub>2</sub> 15%

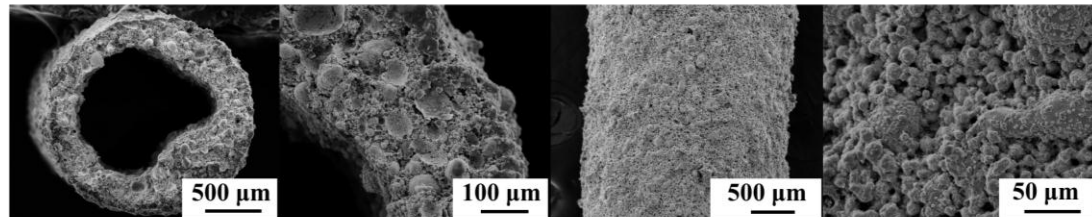

- SS<sub>10/44</sub> sintered 60 min at 1100°C in N<sub>2</sub>:H<sub>2</sub> 15%

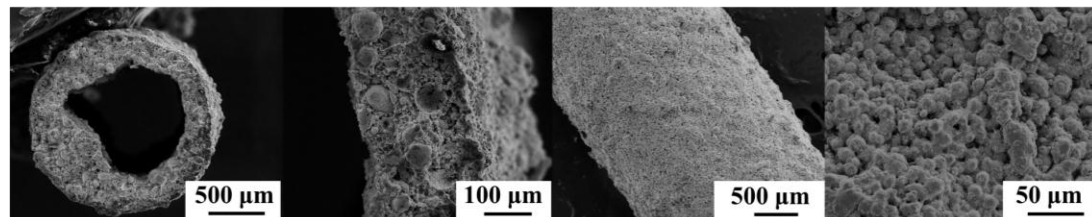

Figure 4. *Cont.*

- SS<sub>10/44</sub> sintered 90 min at 650°C in N<sub>2</sub>:H<sub>2</sub> 15%

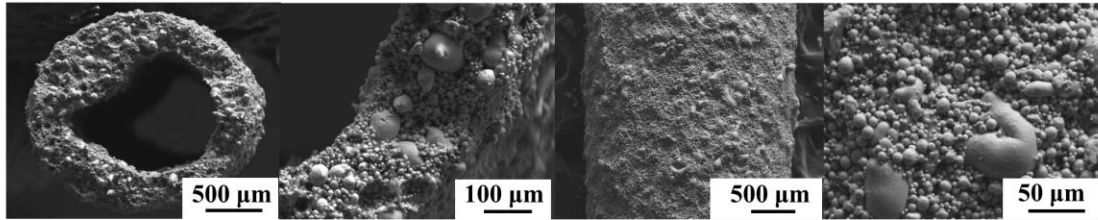

- SS<sub>10/44</sub> sintered 90 min at 700°C in N<sub>2</sub>:H<sub>2</sub> 15%

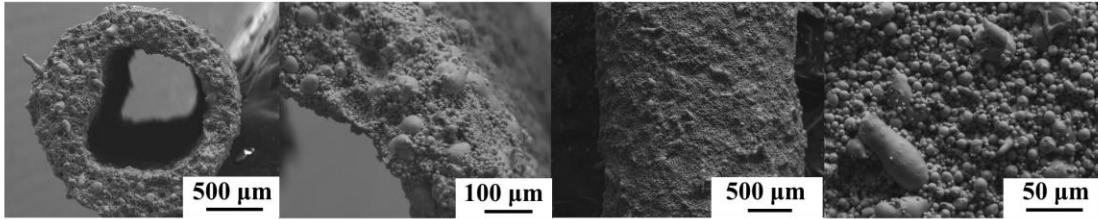

- SS<sub>10/44</sub> sintered 90 min at 800°C in N<sub>2</sub>:H<sub>2</sub> 15%

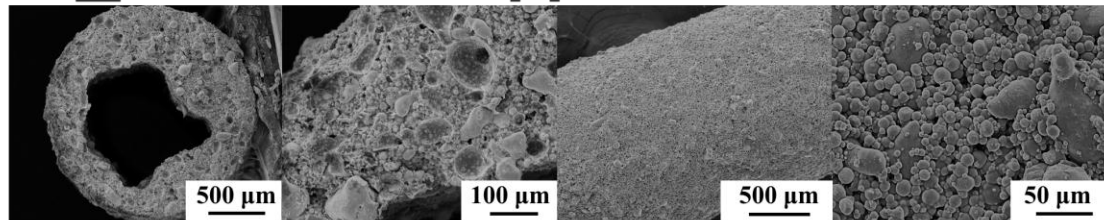

- SS<sub>10/44</sub> sintered 90 min at 900°C in N<sub>2</sub>:H<sub>2</sub> 15%

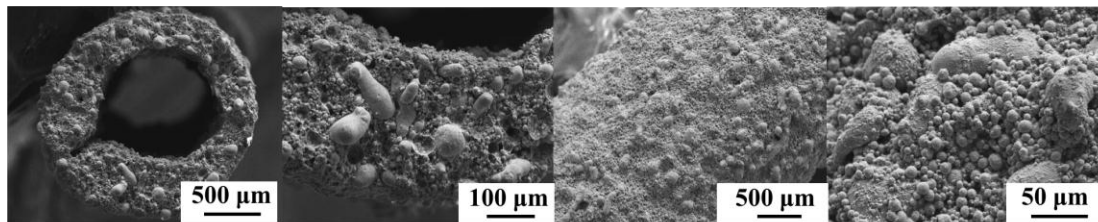

- SS<sub>10/44</sub> sintered 90 min at 1000°C in N<sub>2</sub>:H<sub>2</sub> 15%

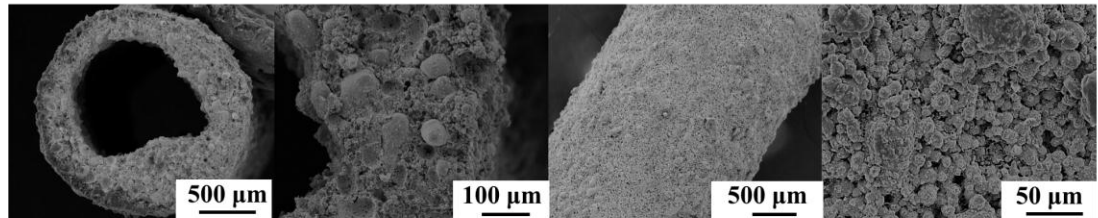

- SS<sub>10/44</sub> sintered 90 min at 1100°C in N<sub>2</sub>:H<sub>2</sub> 15%

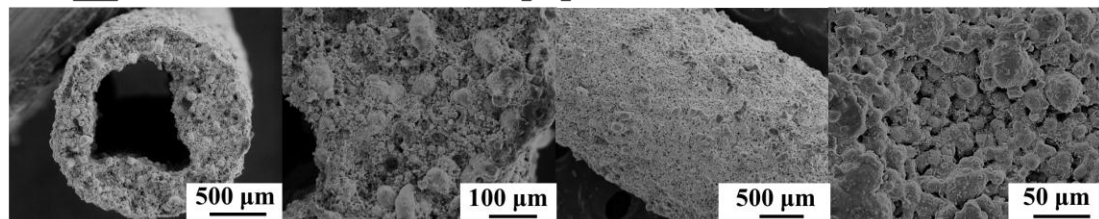

**Figure S4.** SEM images of the green and sintered SS<sub>10/44</sub> HF's at temperature ranging from 650 to 1100 °C for 60 or 90 min.

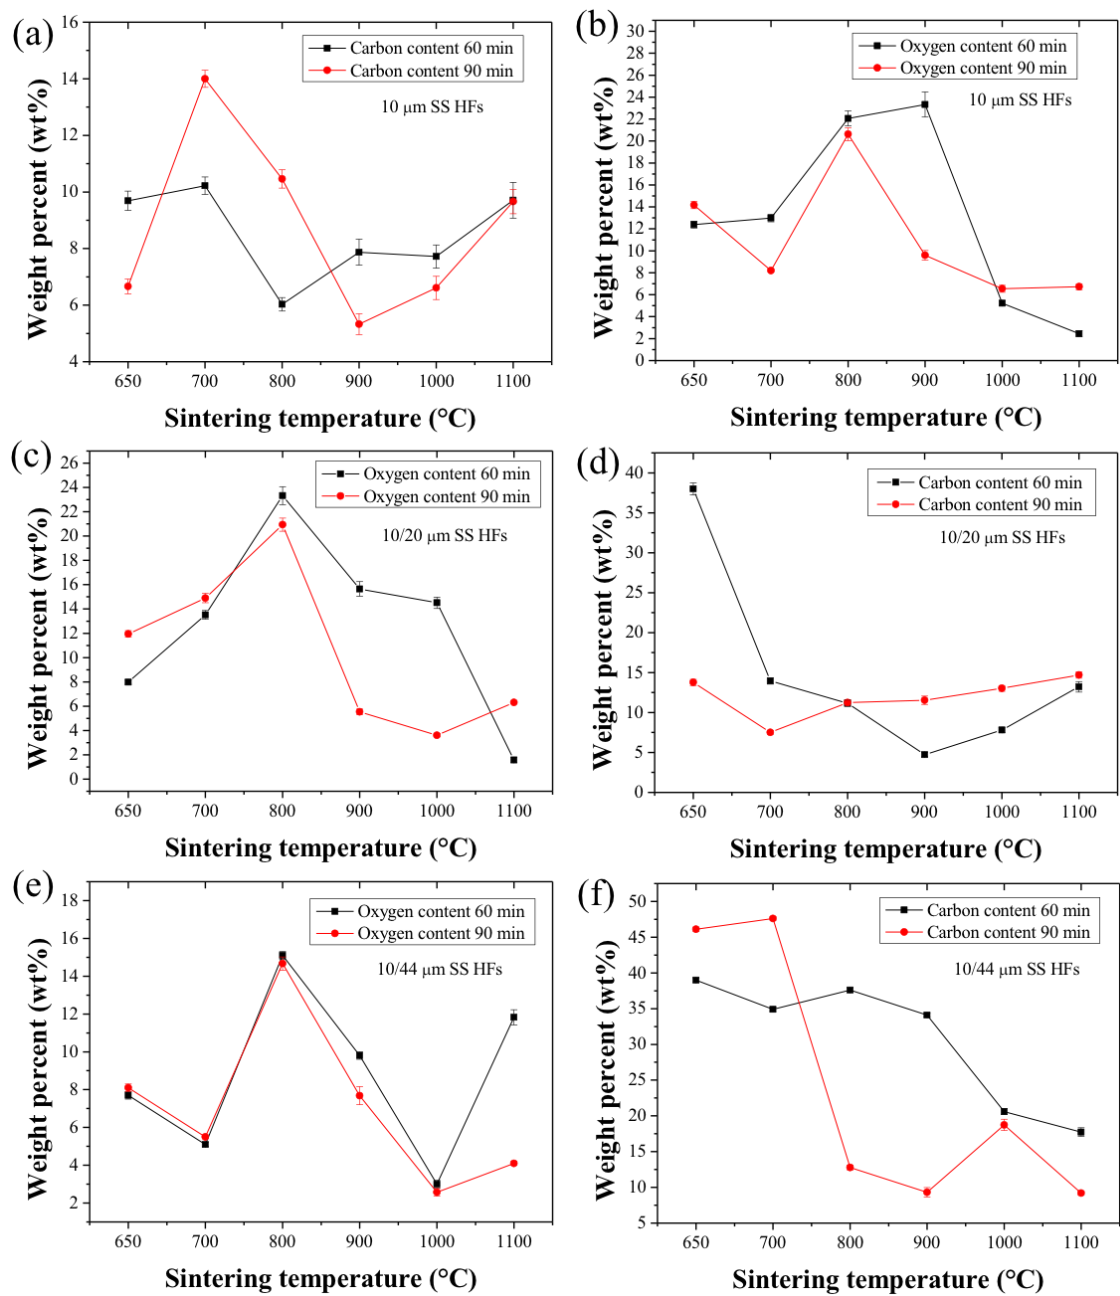

**Figure S5.** Carbon and oxygen elemental analysis of the SS<sub>10</sub> HFs (a,d), SS<sub>10/20</sub> HFs (b,e) and SS<sub>10/44</sub> HFs (c,f).



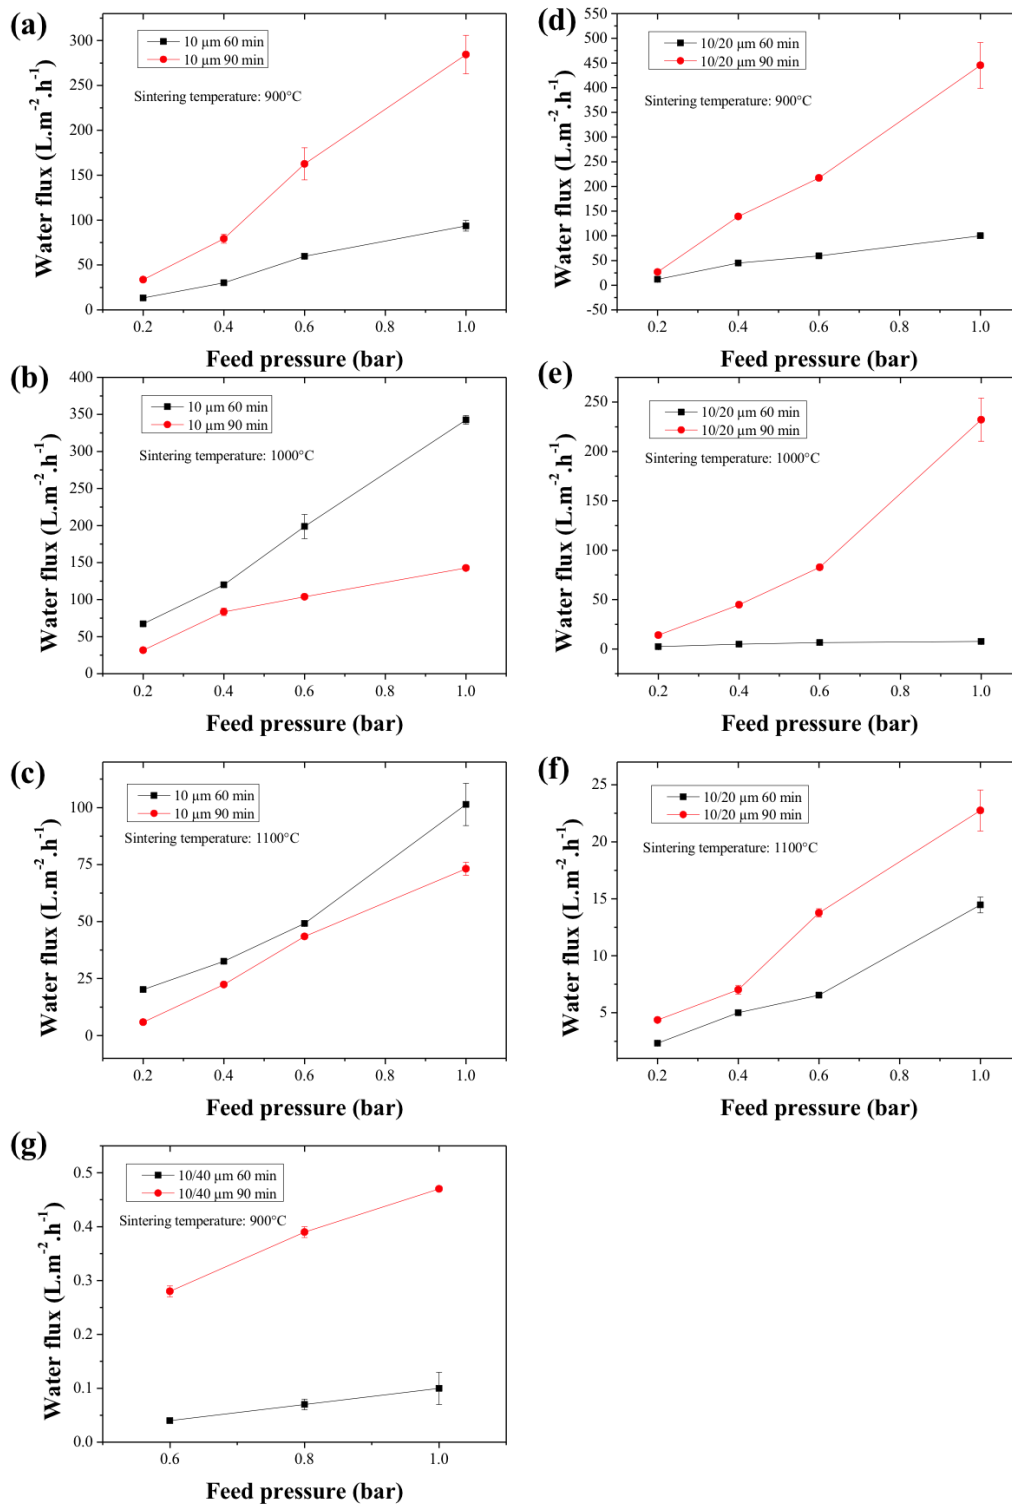

**Figure S6.** Pure water fluxes as a function of the feed pressure: (a), (b) and (c): SS<sub>10</sub> HF; (d), (e) and (f): SS<sub>10/20</sub> HF; g: SS<sub>10/44</sub> HF.
